# Supplementary material for: Microenvironment-switchable singlet oxygen generation by axially-coordinated hydrophilic ruthenium phthalocyanine dendrimers
Source: Royal Society of Chemistry journal article supplement (doi:10.1039/c0cp01015d), 2010-12-21
Supplement: c0cp01015d.pdf [file c0cp01015d.pdf]

# Microenvironment-Switchable Singlet Oxygen Generation by Axially-Coordinated Hydrophilic Ruthenium Phthalocyanine Dendrimers

U. Hahn,<sup>a</sup> F. Setaro,<sup>a</sup> X. Ragàs,<sup>b</sup> A. Gray-Weale,<sup>c</sup> S. Nonell,<sup>\*b</sup> and T. Torres<sup>\*a</sup>

*a* Departamento de Química Orgánica, Universidad Autónoma de Madrid, 28049 Madrid, (Spain)

*b* Grup d'Enginyeria Molecular, Institut Químic de Sarrià, Universitat Ramon Llull, 08017 Barcelona (Spain)

*c* School of Chemistry, Monash University, Clayton 3800, Victoria (Australia)

## Supplementary Information

**Part I. <sup>1</sup>H NMR Spectra of dendritic pyridine ligands 5-7.**

**Part II. <sup>1</sup>H NMR Spectra of RuP1-3.**

**Part III. Phosphorescence at 1140 nm of RuP1-3 in CHCl<sub>3</sub> & D<sub>2</sub>O.**

**Part IV. Singlet oxygen luminescence at 1270 nm of RuP1-3 in CHCl<sub>3</sub>, THF  
& D<sub>2</sub>O.**

### Part I. $^1\text{H}$ NMR Spectra of dendritic pyridine ligands 5-7.

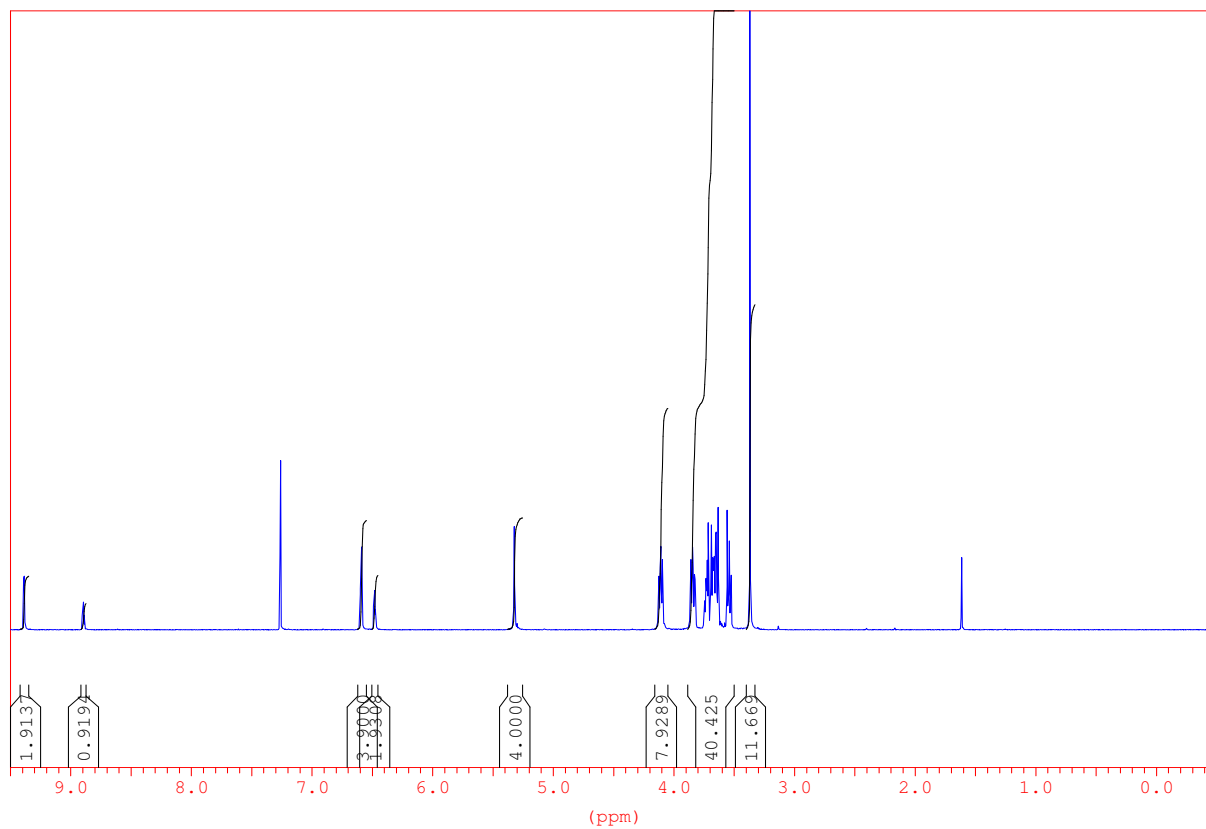

**Figure S1.**  $^1\text{H}$  NMR spectrum of **5** recorded in  $\text{CDCl}_3$ .

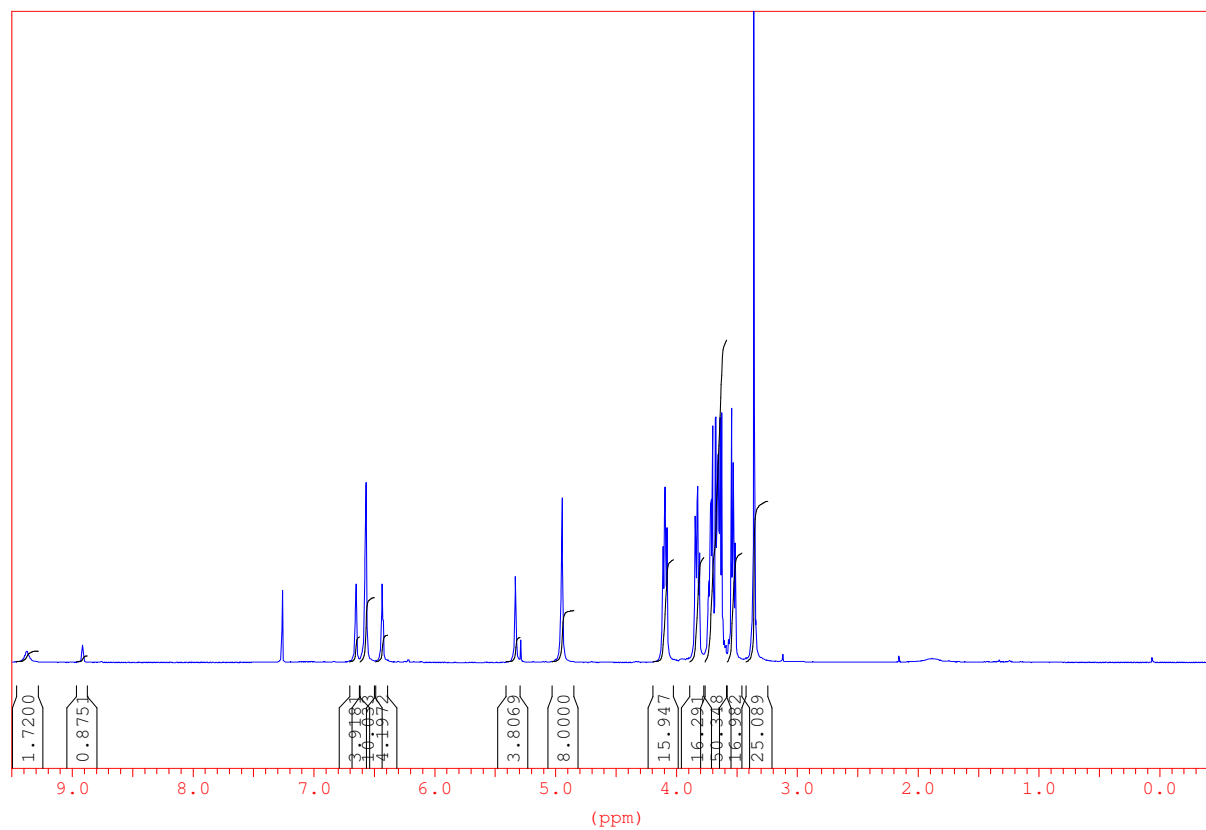

**Figure S2.**  $^1\text{H}$  NMR spectrum of **6** recorded in  $\text{CDCl}_3$ .

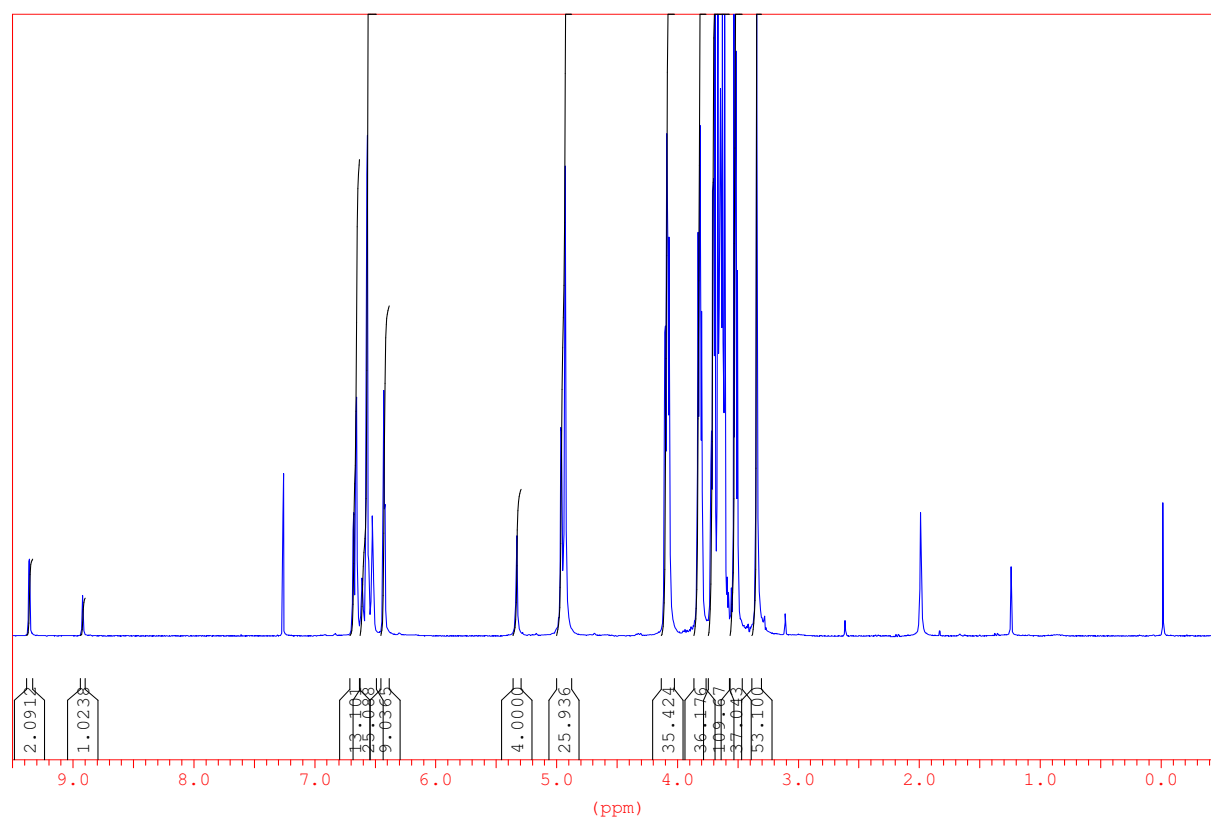

Figure S3.  $^1\text{H}$  NMR spectrum of **7** recorded in  $\text{CDCl}_3$ .

### Part II. $^1\text{H}$ NMR Spectra of RuP1-3.

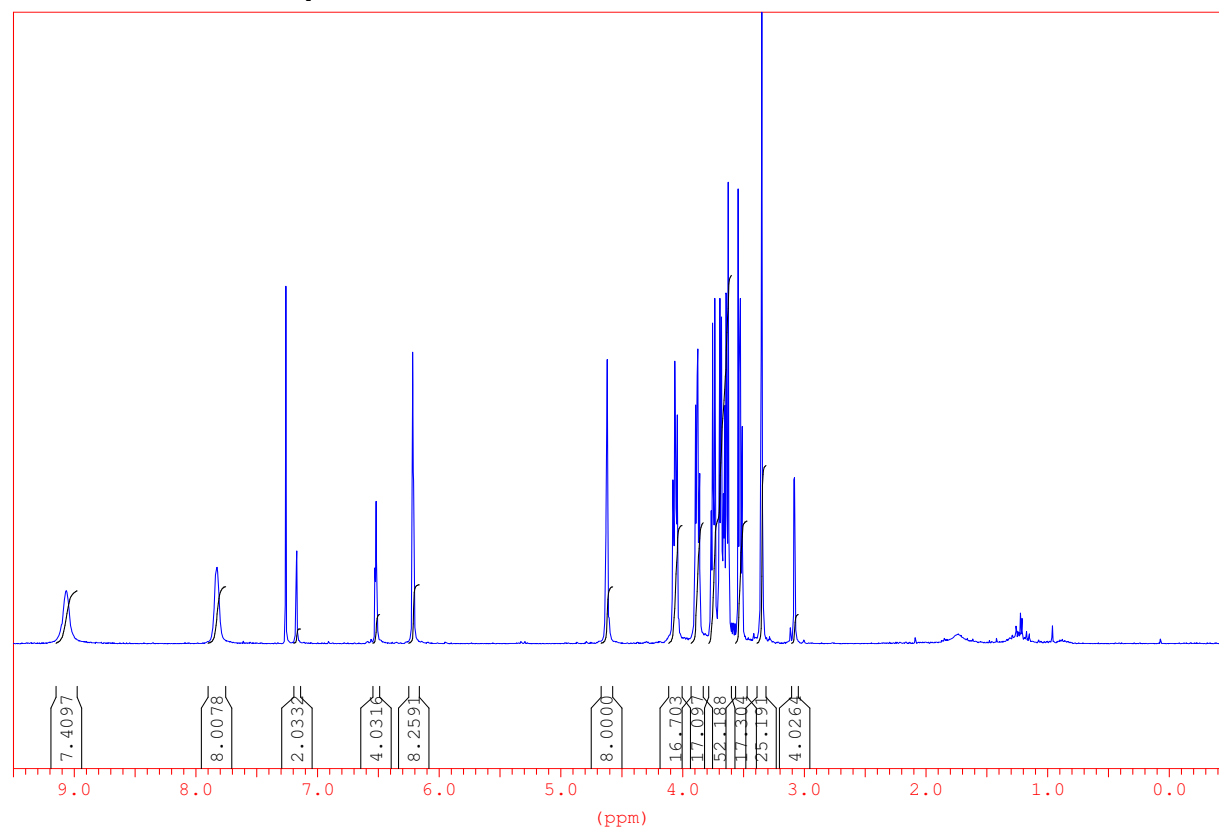

Figure S4.  $^1\text{H}$  NMR spectrum of **RuP1** recorded in  $\text{CDCl}_3$ .

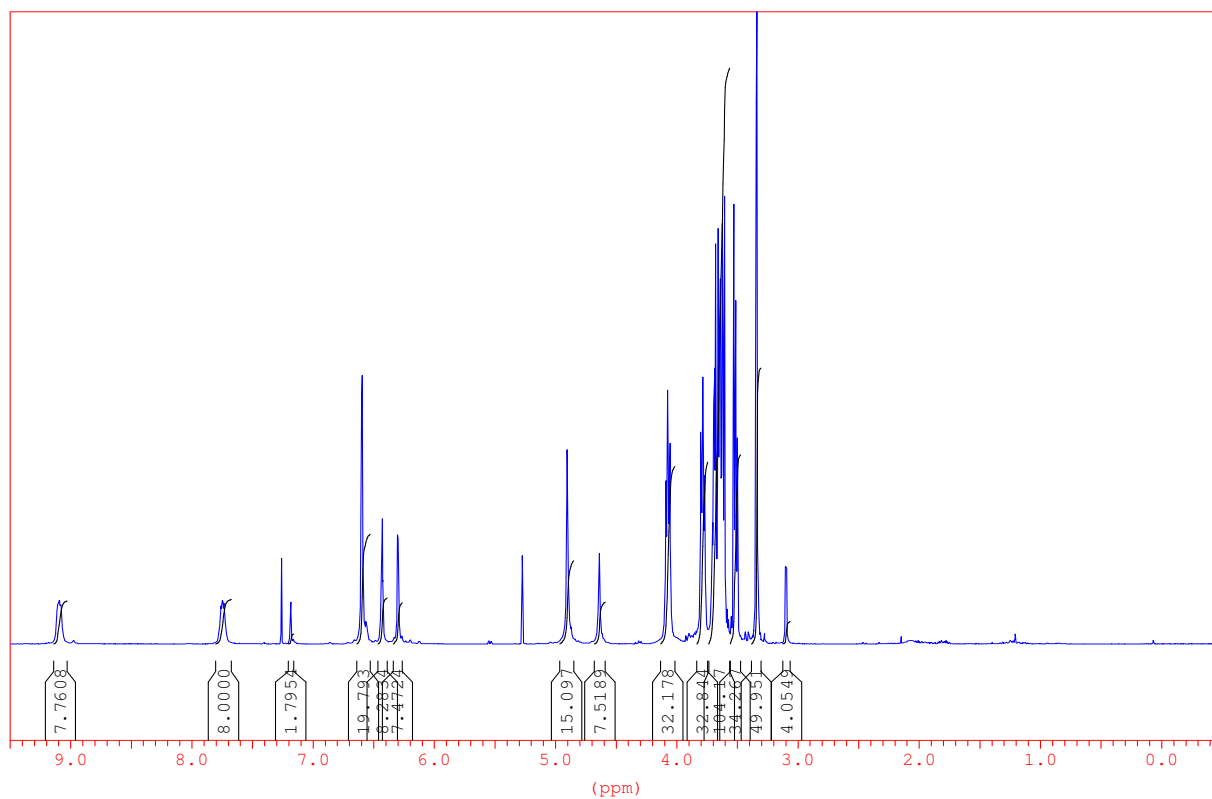

Figure S5.  $^1\text{H}$  NMR spectrum of RuP2 recorded in  $\text{CDCl}_3$ .

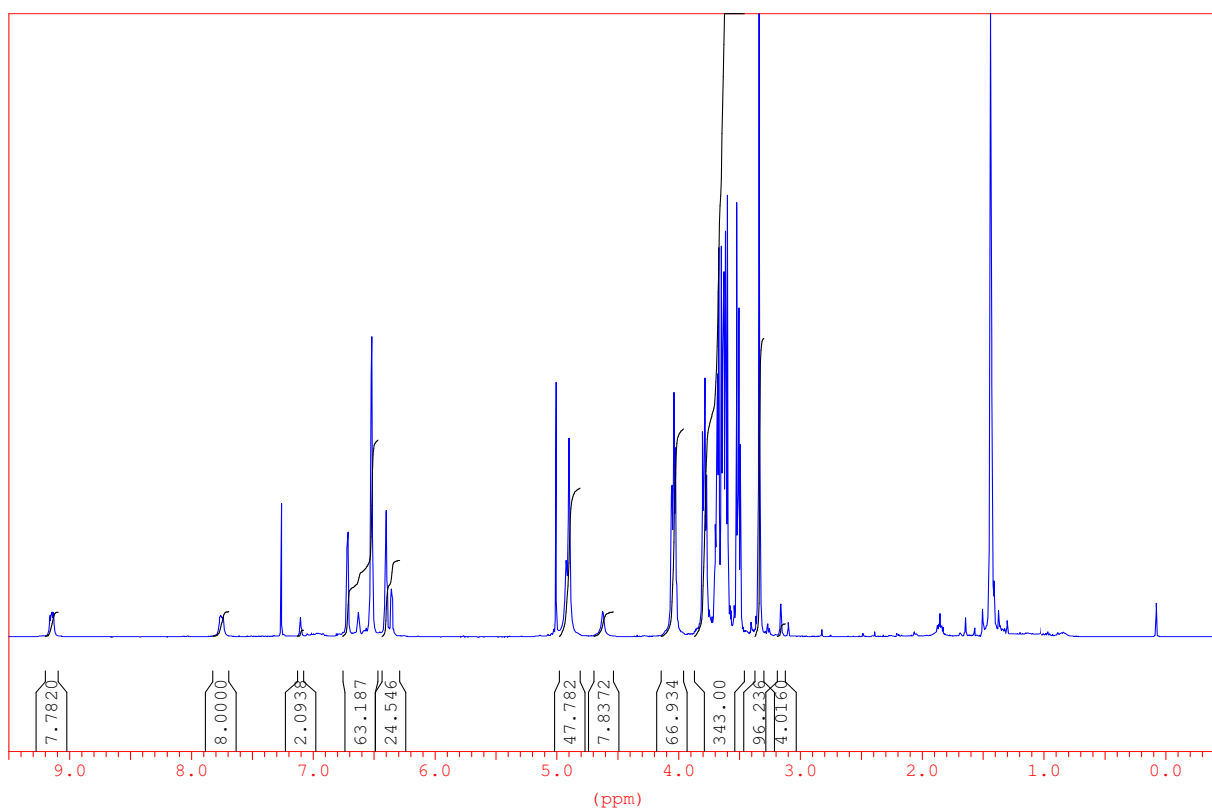

Figure S7.  $^1\text{H}$  NMR spectrum of RuP3 recorded in  $\text{CDCl}_3$ .

### Part III. Phosphorescence at 1140 nm of RuP1-3.

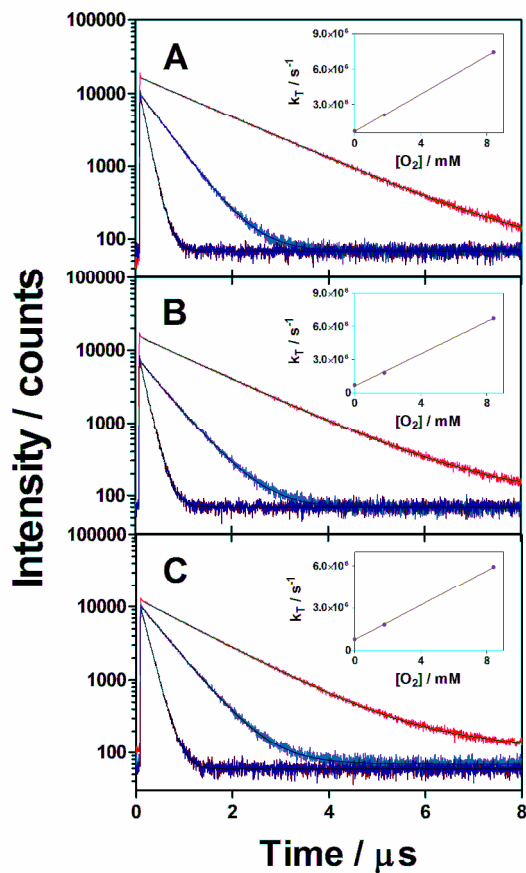

**Figure S8.** Time-resolved near-IR phosphorescence measurements at 1140 nm for (A) **RuP1**, (B) **RuP2**, and (C) **RuP3** in  $\text{CHCl}_3$ , under argon-saturated atmosphere (red), air-saturated atmosphere (green), and oxygen-saturated atmosphere (blue). Insets: Oxygen concentration dependence of the triplet decay rate constant.

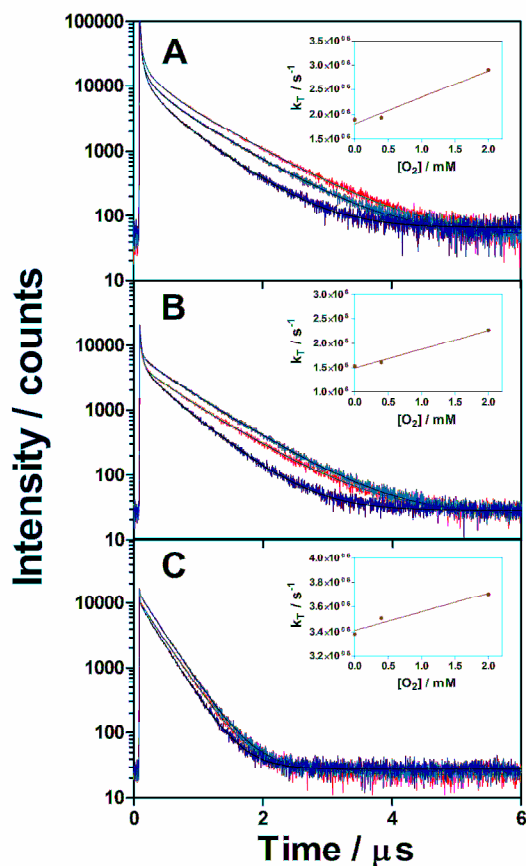

**Figure S9.** Time-resolved near-IR phosphorescence measurements at 1140 nm for (A) **RuP1**, (B) **RuP2**, and (C) **RuP3** in D<sub>2</sub>O, under argon-saturated atmosphere (red), air-saturated atmosphere (green), and oxygen-saturated atmosphere (blue). Insets: Oxygen concentration dependence of the triplet decay rate constant.

**Table S1.** Triplet decay rate constant values ( $k_T \times 10^{-5} / s^{-1}$ ) of **RuP1-3**.

| Atmosphere | RuP1              |      |                  | RuP2              |      |                  | RuP3              |      |                  |
|------------|-------------------|------|------------------|-------------------|------|------------------|-------------------|------|------------------|
|            | CHCl <sub>3</sub> | THF  | D <sub>2</sub> O | CHCl <sub>3</sub> | THF  | D <sub>2</sub> O | CHCl <sub>3</sub> | THF  | D <sub>2</sub> O |
| Argon      | 6.62              | 6.99 | 18.9             | 6.99              | 7.25 | 15.3             | 7.93              | 10.8 | 33.8             |
| Air        | 20.6              | 20.3 | 19.3             | 18.1              | 18.7 | 16.1             | 18.0              | 19.2 | 35.1             |
| Oxygen     | 74.6              | 112  | 29.0             | 67.6              | 86.2 | 22.7             | 59.2              | 80.6 | 37.0             |

**Part IV. Singlet oxygen luminescence at 1270 nm of RuP1-3 in CHCl<sub>3</sub>, THF  
& D<sub>2</sub>O.**

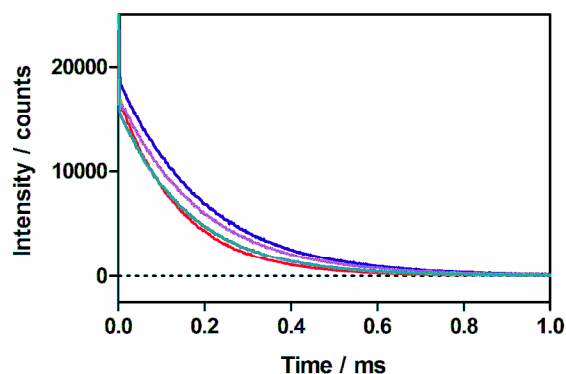

**Figure S10.** Time-resolved near-IR phosphorescence measurements at 1270 nm in CHCl<sub>3</sub> for TPP (red), **RuP1** (blue), **RuP2** (violet), and **RuP3** (green).

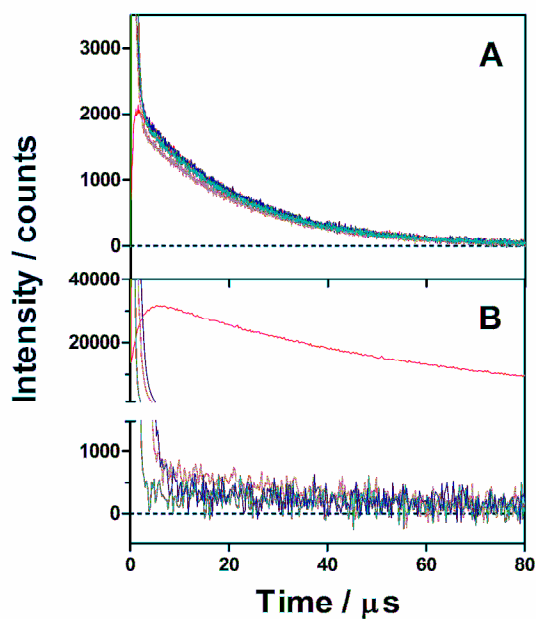

**Figure S11.** Time-resolved near-IR phosphorescence measurements at 1270 nm in (A) THF and (B) D<sub>2</sub>O for the references (red; TPP in THF and TPPS in D<sub>2</sub>O), **RuP1** (blue), **RuP2** (violet), and **RuP3** (green).
